# Supplementary material for: Self-supported 3D coral-like copper/poly diphenylamine on nickel foam: multifunctional exploration of overall electrochemical water splitting, alcohol oxidation reaction and supercapacitor applications
Source: Royal Society of Chemistry journal article supplement (doi:10.1039/d3nj05182j), 2023-12-27
Supplement: d3nj05182j1.pdf [file d3nj05182j1.pdf]

## **Supplementary Information**

# **Self-supported 3D Coral-like Copper/ Polydiphenylamine on Nickel Foam: Multifunctional Exploration of Overall Electrochemical Water Splitting, Alcohol Oxidation Reaction and Supercapacitor Applications**

Asha Raveendran<sup>a</sup>, Mijun Chandran<sup>b</sup>, Soo Chool Lee<sup>c</sup>, Masoom Raza Siddiqui<sup>d</sup>,  
Saikh Mohammad Wabaidur<sup>d</sup>, Ragupathy Dhanusuraman<sup>a,e\*</sup>

*<sup>a</sup>Nano Electrochemistry Lab (NEL), Department of Chemistry, National Institute of  
Technology Puducherry, Karaikal - 609609, India*

*<sup>b</sup>Department of Chemistry, Central University of Tamil Nadu, Thiruvavur, 610005, India*

*<sup>c</sup>Research Institute of Advanced Energy Technology, Kyungpook National University, Daegu  
41566, Republic of Korea*

*<sup>d</sup>Chemistry Department, College of Science, King Saud University, Riyadh 11451, Saudi  
Arabia*

*<sup>a,e</sup>Nano Electrochemistry Laboratory (NEL), Central Instrumentation Facility (CIF), School  
of Physical, Chemical and Applied Sciences, Pondicherry University, Pondicherry, 605014,  
India*

---

**\*Corresponding Author:**

**Prof. Ragupathy Dhanusuraman, MRSC**

Email: ragu@pondiuni.ac.in; ragu.nitpy@gmail.com

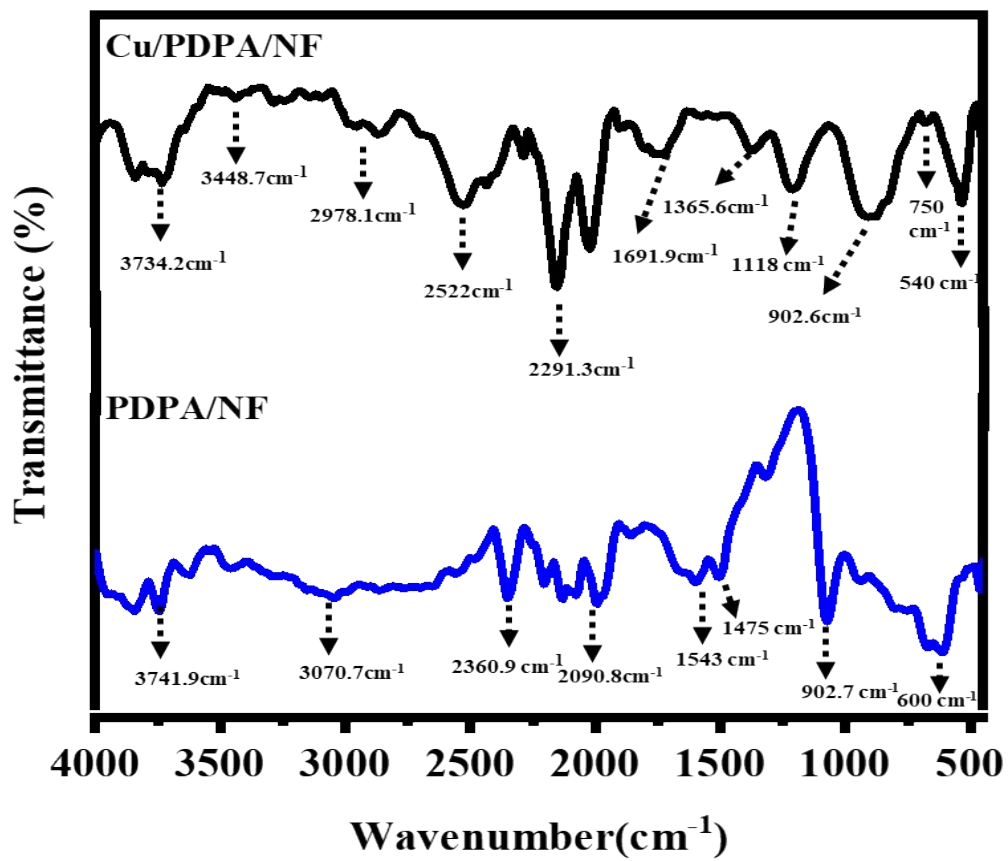

Fig S1. FTIR analysis of PDPA/NF and Cu/PDPA/NF

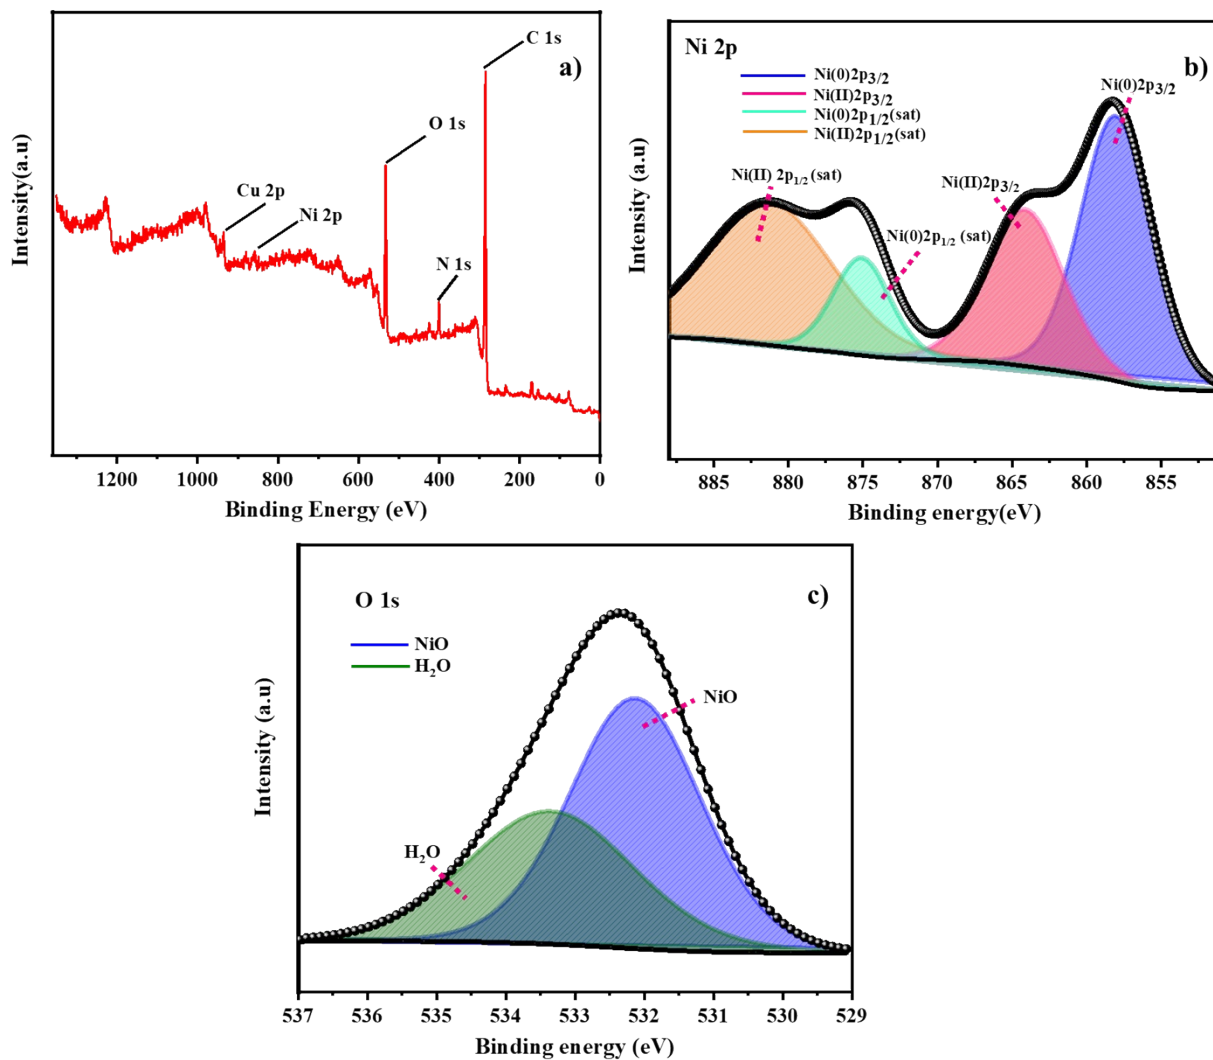

**Fig. S2. X-ray photoelectron spectroscopy (XPS) spectra of (a) Overall XPS survey spectra of Cu/PDPA/NF and XPS spectra of (b) Ni 2p and (c) O 1s**

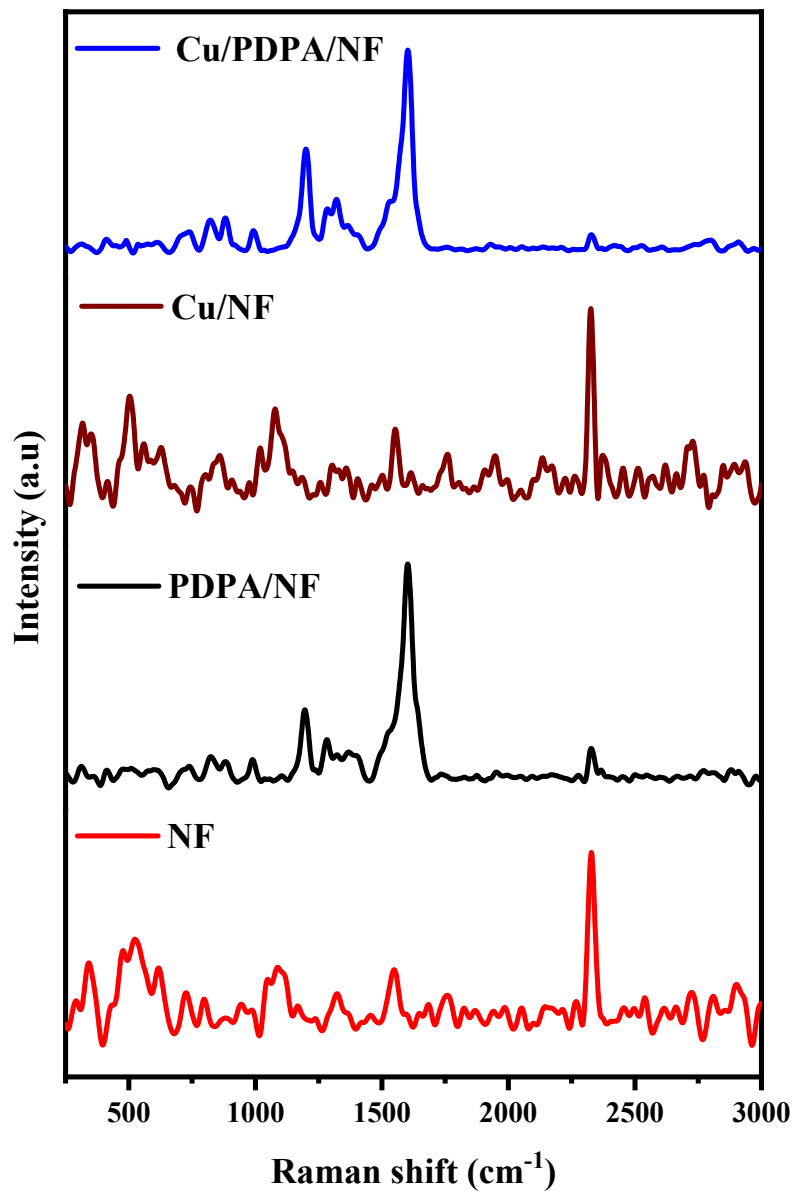

Fig S3. Raman analysis of NF, Cu/PDPA, PDPA/NF and Cu/PDPA/NF

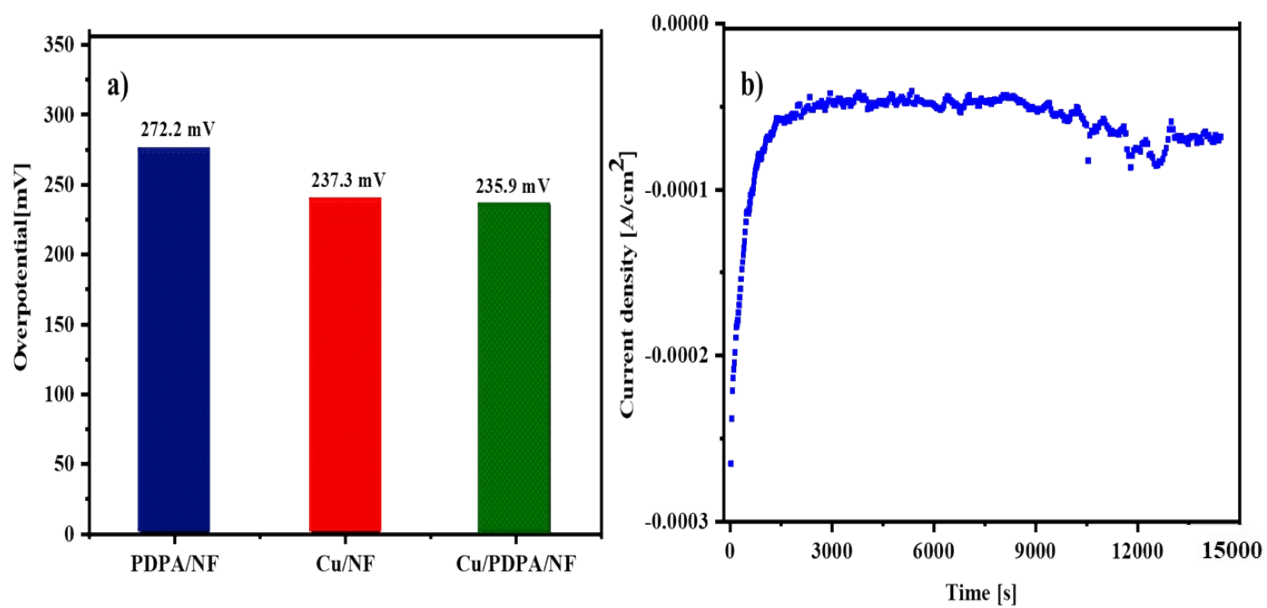

**Fig S4. (a) Overpotential of Cu/PDPA/NF, PDPA/NF and Cu/NF at 10mAcm<sup>-2</sup> (HER)**

**(b) Long-term durability test of of Cu/PDPA/NF during Hydrogen evolution reaction**

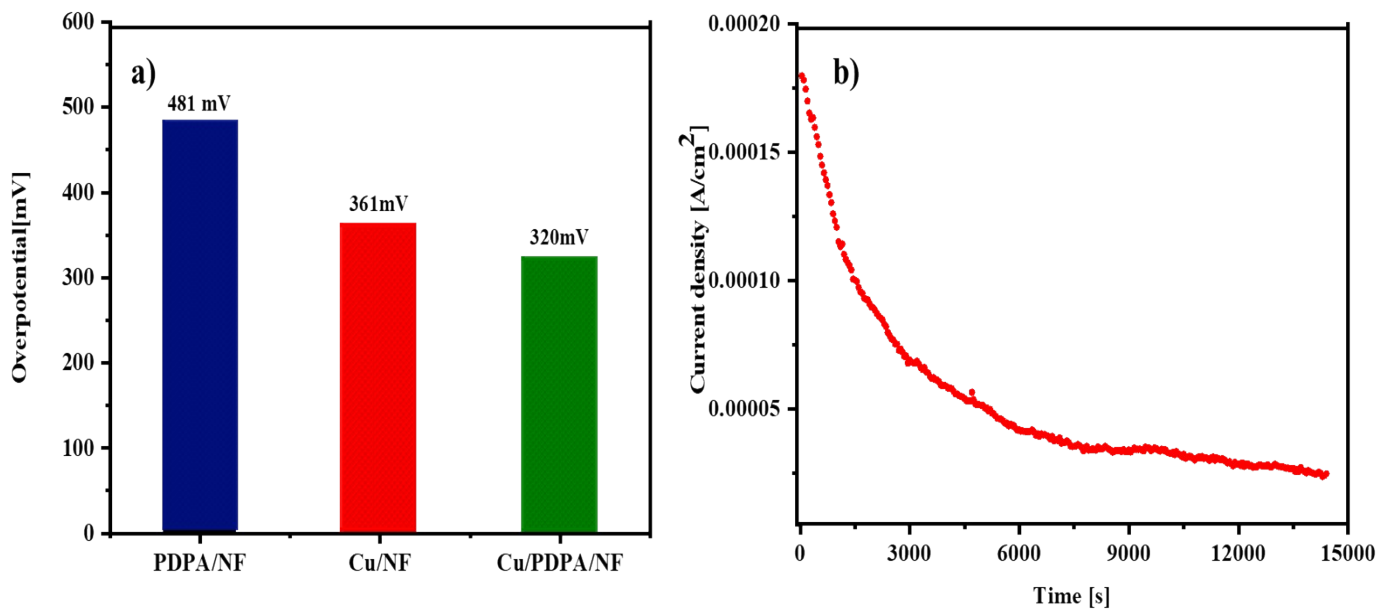

**Fig S5. (a) Overpotential of Cu/PDPA/NF, PDPA/NF and Cu/NF at  $10\text{mA}/\text{cm}^2$  (OER)**

**(b) Long-term durability test of of Cu/PDPA/NF during Oxygen evolution reaction**

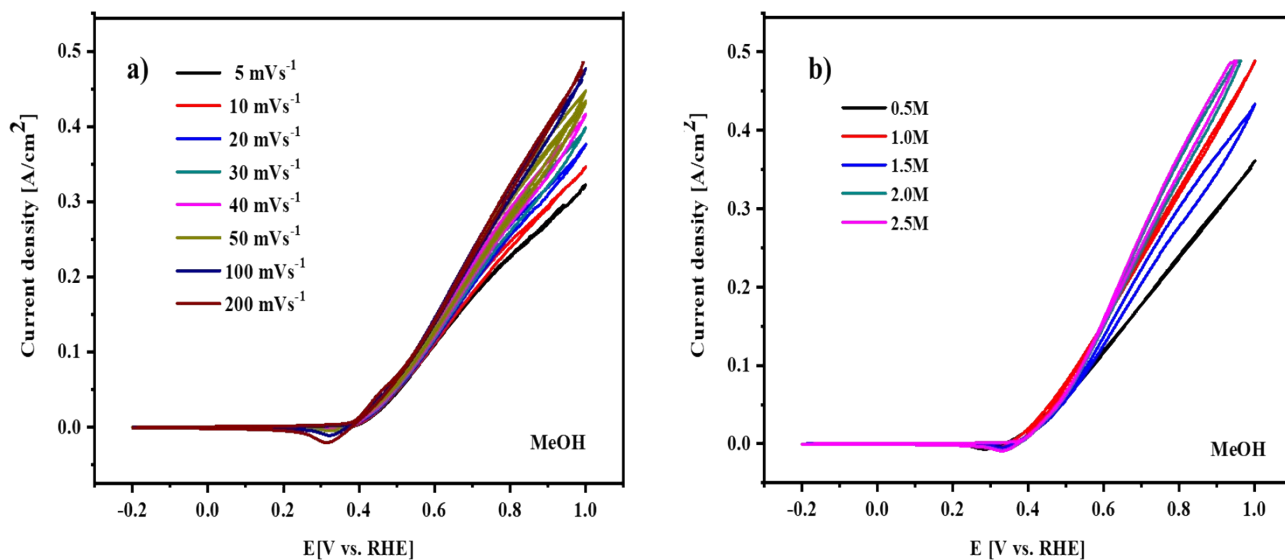

**Fig S6. (a) CV plot of Cu/PDPA/NF in the presence of different methanol concentrations 0.5-2.0M in 1.0 M KOH at scan rate of 50 mVs<sup>-1</sup> (b) Cyclic Voltammogram of Cu/PDPA/NF at varying scan rates such as 5 to 200 mV/s in 0.1M KOH+ 1.0M Methanol.**

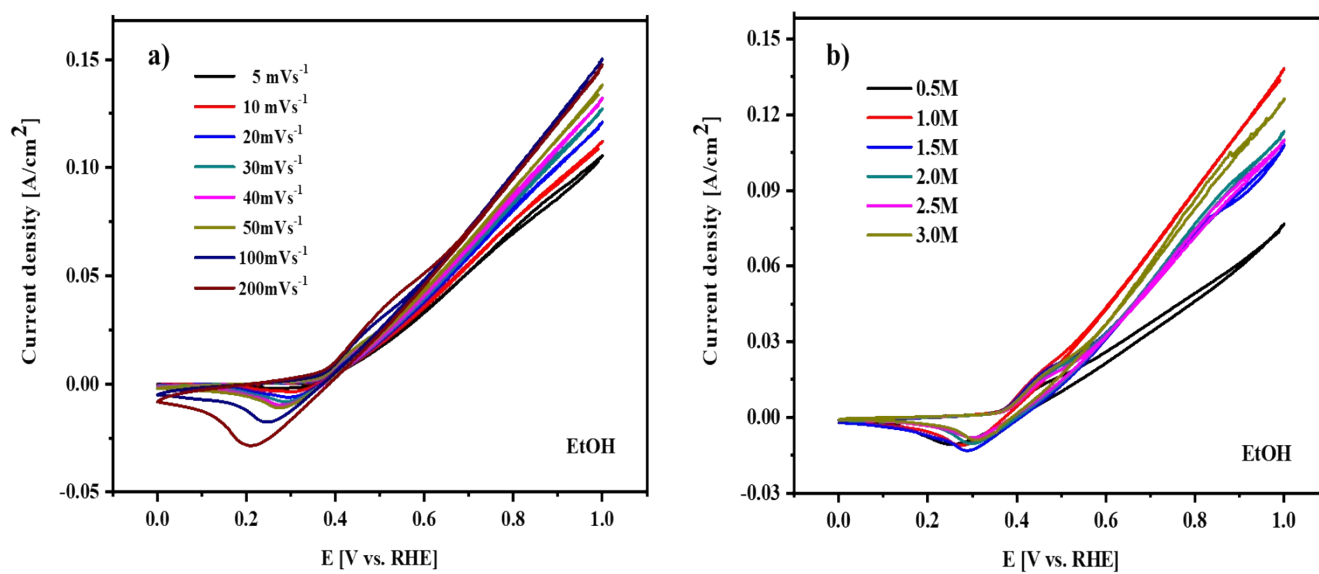

**Fig S7. (a) CV plot of Cu/PDPA/NF in the presence of different Ethanol concentrations 0.5-2.0M in 1.0 M KOH at scan rate of 50 mVs<sup>-1</sup> (b)Cyclic Voltammogram of Cu/PDPA/NF at varying scan rates such as 5 to 200 mV/s in 1.0 M KOH+ 1.0M Ethanol**



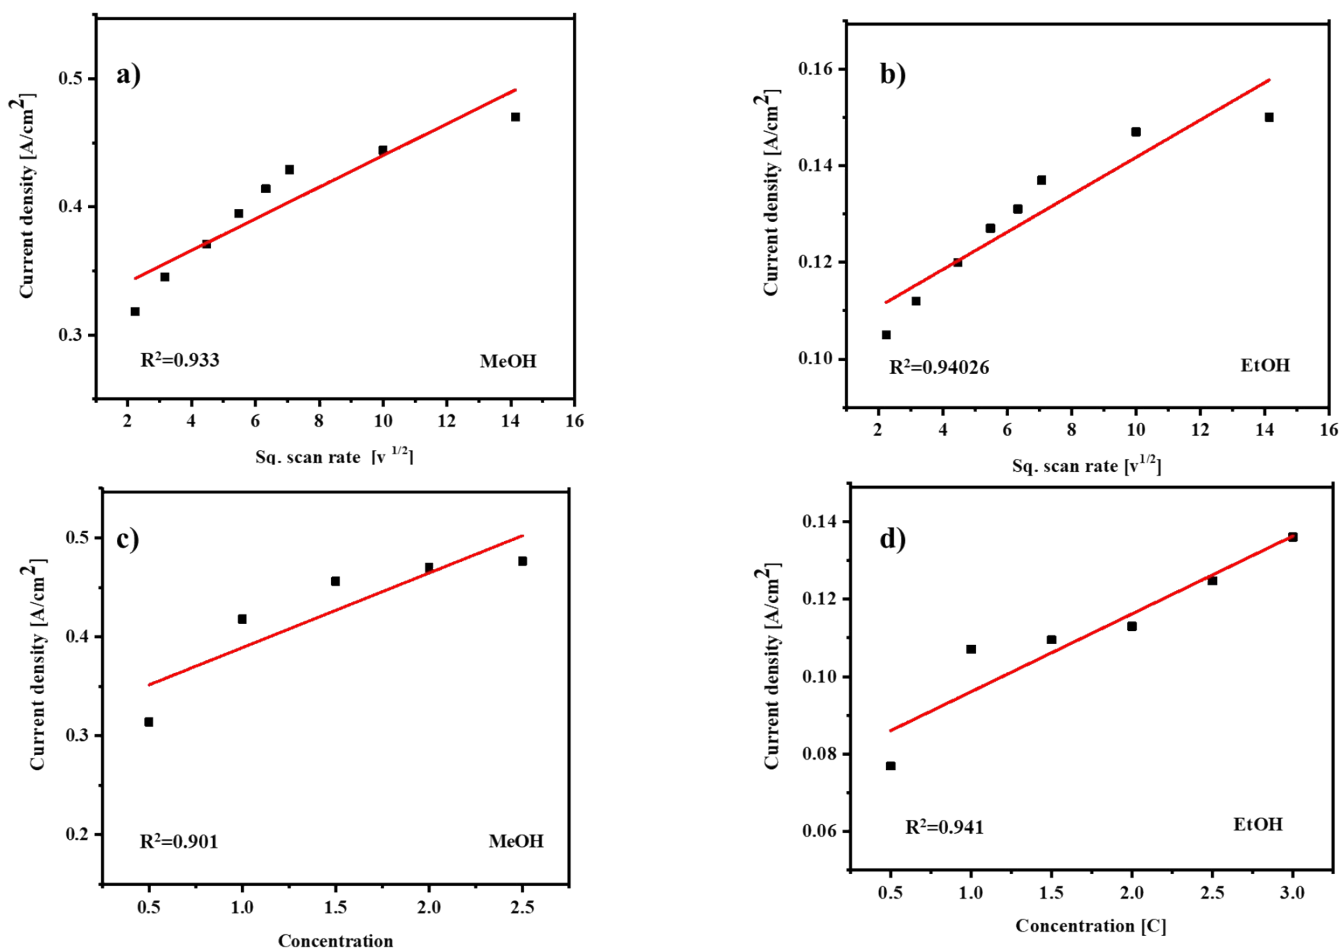

**Fig S8. linear relationship between (scan rate)<sup>1/2</sup> and current density of Cu/PDPA/NF for (a) Methanol (b) Ethanol and linear relationship between concentration and current density (c) Methanol and (d) Ethanol**

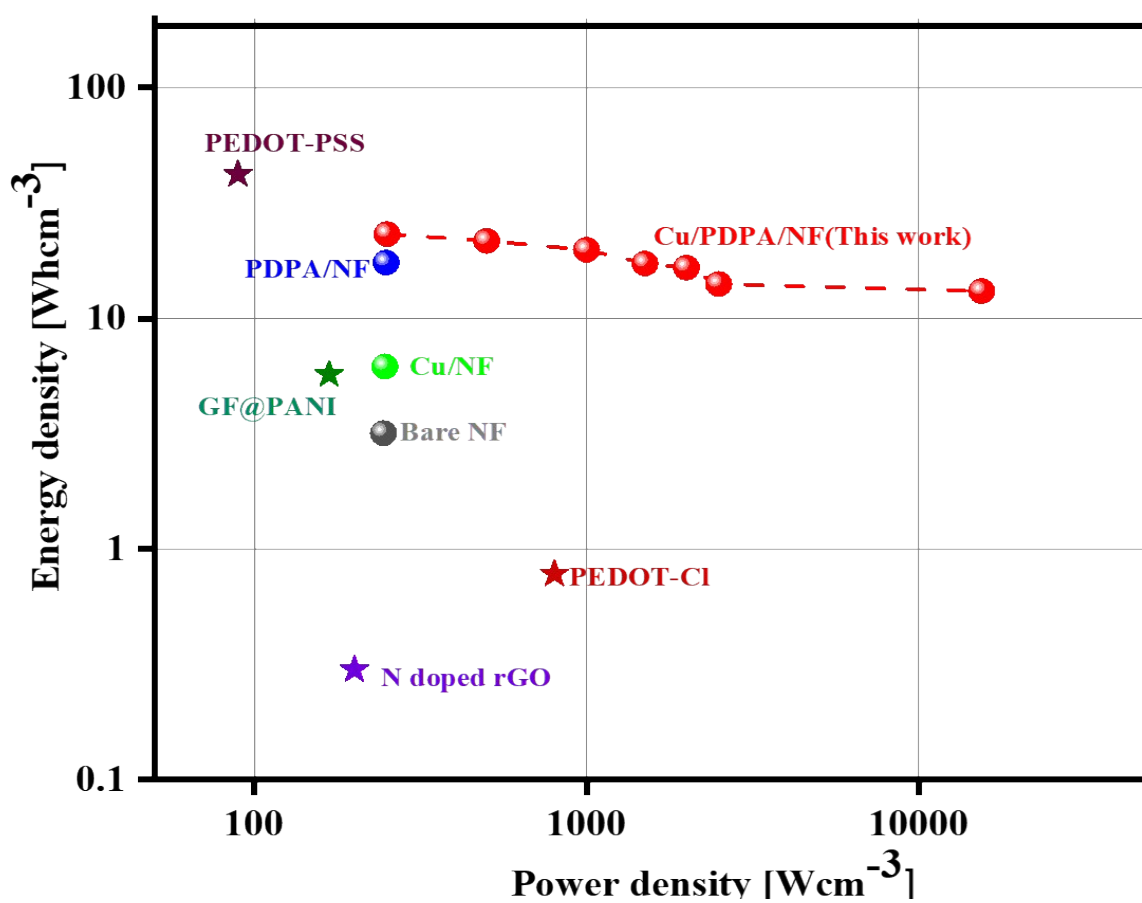

Fig S9. Areal Ragone plot comparing Cu/PDPA/NF reported here to other polymer based and 2D capacitors including N-doped rGO<sup>1</sup>, PEDOT-CI<sup>2</sup>, PEDOT:PSS<sup>3</sup> and GF@PANI FSSC<sup>4</sup>

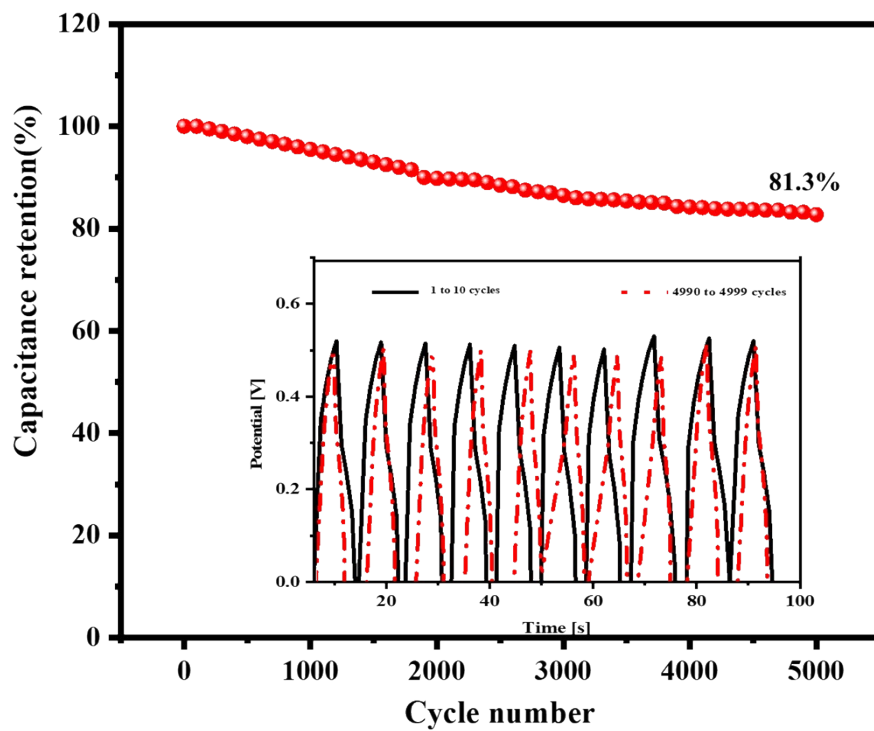

**Fig S10. Percentage of Capacitance retention v/s. Cycle number of Cu/PDPA/NF with the comparison of first and last five cycles of 5000 cycles of the cyclic stability**

**Table S1. Comparison on of Electrolyte medium, Tafel slope & Overpotential of**

|                                                                                          | Electrolyte<br>medium    | Tafel slope<br>(mv dec <sup>-1</sup> ) | Overpotential<br>(mV)@10mAcm <sup>-2</sup> | Reference        |
|------------------------------------------------------------------------------------------|--------------------------|----------------------------------------|--------------------------------------------|------------------|
| CuONS                                                                                    | 0.2M<br>borate<br>buffer | 59                                     | 540                                        | 5                |
| (Co <sub>0.21</sub> Ni <sub>0.25</sub> Cu <sub>0.59</sub> ) <sub>2</sub> Se <sub>2</sub> | 1MKOH                    | 53                                     | 278                                        | 6                |
| Cu <sub>3</sub> (BTC) <sub>2</sub> MOF                                                   | 1MKOH                    | 108                                    | 330                                        | 7                |
| Fe <sub>2</sub> O <sub>3</sub> @CuO                                                      | 1MKOH                    | 41                                     | 398                                        | 8                |
| Polycrystalline<br>Cu(OH) <sub>2</sub>                                                   | 1MKOH                    | 78                                     | 550                                        | 9                |
| CuFe <sub>2</sub> O <sub>4</sub>                                                         | 1MKOH                    | 94                                     | 340                                        | 10               |
| CuSe/NF                                                                                  | 1MKOH                    | 89                                     | 297                                        | 11               |
| Cu <sub>2</sub> Se/NF                                                                    | 1MKOH                    | 62.4                                   | 200                                        | 12               |
| Cu/PDPA/NF                                                                               | 1MKOH                    | 47                                     | 320                                        | <b>This work</b> |

**Cu/PDPA/NF in Oxygen Evolution reaction with other copper based electrocatalysts.**

1. S. Liu, J. Xie, H. Li, Y. Wang, H. Y. Yang, T. Zhu, S. Zhang, G. Cao and X. Zhao, *Journal of Materials Chemistry A*, 2014, **2**, 18125-18131.
2. L. Zhang, W. Viola and T. L. Andrew, *ACS applied materials & interfaces*, 2018, **10**, 36834-36840.
3. W. Liu, C. Lu, H. Li, R. Y. Tay, L. Sun, X. Wang, W. L. Chow, X. Wang, B. K. Tay and Z. Chen, *Journal of Materials Chemistry A*, 2016, **4**, 3754-3764.
4. X. Zheng, L. Yao, Y. Qiu, S. Wang and K. Zhang, *ACS Applied Energy Materials*, 2019, **2**, 4335-4344.
5. S. M. Pawar, B. S. Pawar, B. Hou, J. Kim, A. T. A. Ahmed, H. S. Chavan, Y. Jo, S. Cho, A. I. Inamdar and J. L. Gunjekar, *Journal of Materials Chemistry A*, 2017, **5**, 12747-12751.
6. X. Cao, E. Johnson and M. Nath, *Journal of Materials Chemistry A*, 2019, **7**, 9877-9889.
7. H. Li, Y. Liu, F. He, H. Yang, Z. Li, Q. Zhou and K. Tang, *International Journal of Hydrogen Energy*, 2020, **45**, 21540-21546.
8. Y. Gao, N. Zhang, C. Wang, F. Zhao and Y. Yu, *ACS Applied Energy Materials*, 2019, **3**, 666-674.
9. S. Cui, X. Liu, Z. Sun and P. Du, *ACS Sustainable Chemistry & Engineering*, 2016, **4**, 2593-2600.
10. M. Li, Y. Xiong, X. Liu, X. Bo, Y. Zhang, C. Han and L. Guo, *Nanoscale*, 2015, **7**, 8920-8930.
11. B. Chakraborty, R. Beltrán-Suito, V. Hlukhyy, J. Schmidt, P. W. Menezes and M. Driess, *ChemSusChem*, 2020, **13**, 3222-3229.
12. W. Shi and J. Lian, *International Journal of Hydrogen Energy*, 2019, **44**, 22983-22990.

## Reference
